# Supplementary material for: Vegetation restoration of abandoned cropland improves soil ecosystem multifunctionality through alleviating nitrogen-limitation in the China Danxia
Source: Frontiers journal article supplement (doi:10.3389/fpls.2023.1116179), 2023-02-28

## Microbial nutrient limitation and EMF

+ Increased  
 - Decreased

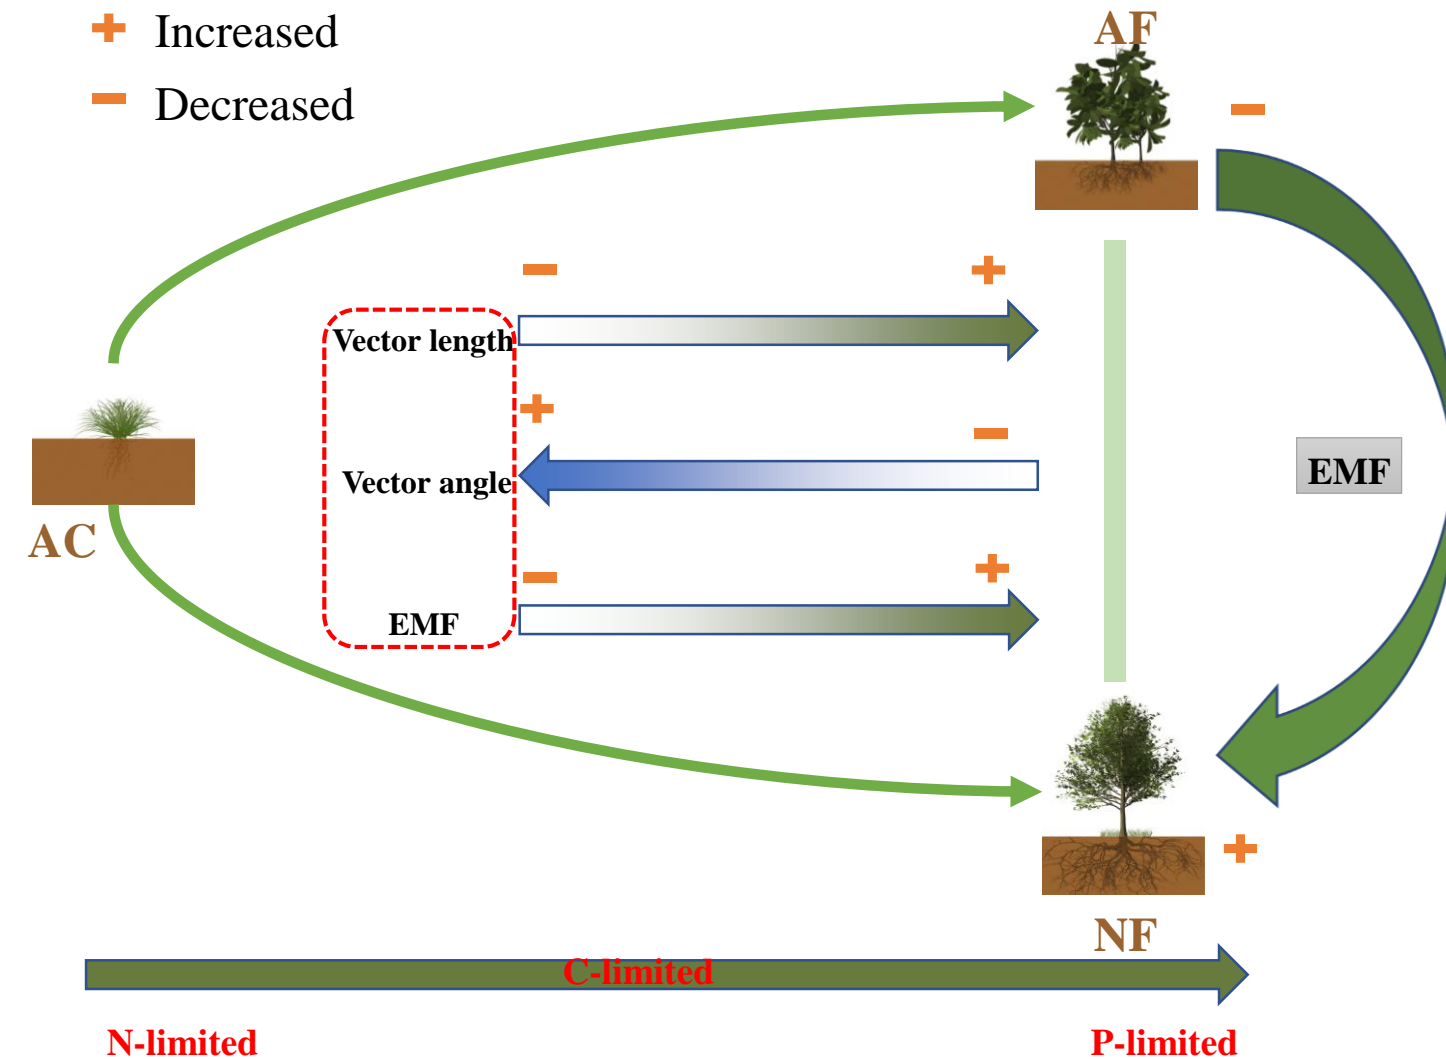

## Influence factors

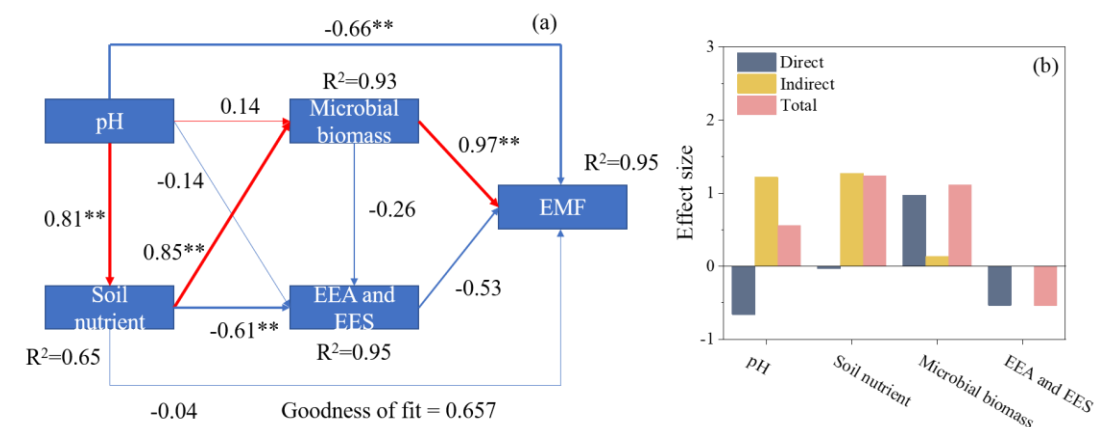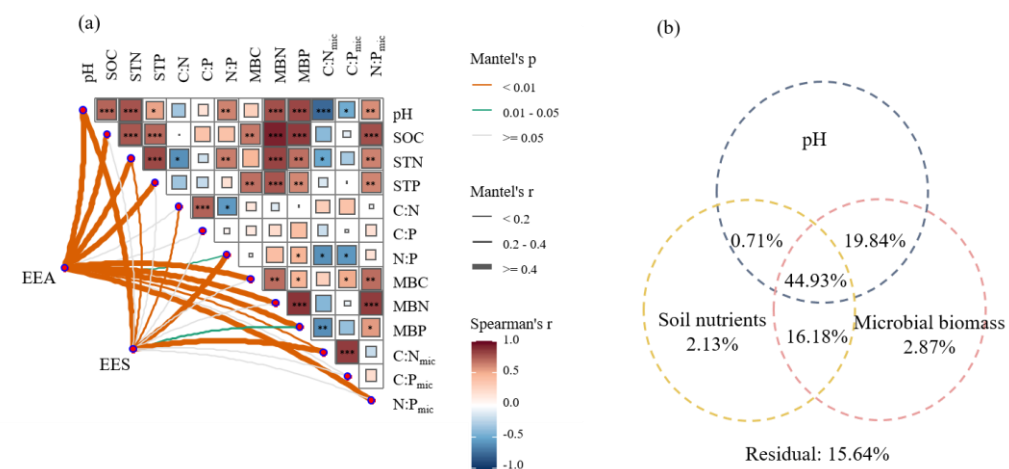

Supplement: Image_1.PDF [file Image_1.PDF]
