# Supplementary material for: Vegetation restoration of abandoned cropland improves soil ecosystem multifunctionality through alleviating nitrogen-limitation in the China Danxia
Source: Front Plant Sci. 2023 Feb 28;14:1116179. doi: 10.3389/fpls.2023.1116179 (PMC10011436; doi:10.3389/fpls.2023.1116179)
Supplement: Supplementary file 1 [file DataSheet_1.xlsx]

## Sheet: Data
	pH	SOC(g·kg-1)	TN(g·kg-1)	TP(g·kg-1)	MBC(mg·kg-1)	MBN(mg·kg-1)	MBP(mg·kg-1)	BG(nmol/g/h)	CBH(nmol/g/h)	BX(nmol/g/h)	NAG(nmol/g/h)	LAP(nmol/g/h)	AP(nmol/g/h)
NF-1	6.15	20.29	1.79	0.781245	176.128	39.2677	30.0749	202.879	109.426	108.777	107.7	140.795	498.59
NF-1	6.28	19.8979	1.87	0.77886	172.105	34.8577	28.935	215.48	101.315	111.316	97.4906	160.22	512.054
NF-1	6.4	19.7819	1.68	0.764569	189.252	45.3208	29.4567	213.558	92.8193	100.03	91.1345	147.6	539.158
NF-2	6.1	15.2552	0.93	0.496793	62.4662	16.2914	26.5238	145.879	86.3858	72.8111	71.6509	125.356	342.497
NF-2	6.13	13.8631	1.1	0.487291	62.1042	16.5004	29.0068	129.256	92.8193	82.8348	87.5892	113.322	371.197
NF-2	6.21	13.7471	1.07	0.472575	58.1943	17.0486	28.5338	130.744	88.9113	86.9923	88.6468	120.696	328.04
AF-1	6.14	14.3852	1.35	0.684524	151.927	27.6493	20.8759	193.335	92.3377	104.832	92.7835	153.96	367.71
AF-1	5.98	14.2251	1.41	0.690266	150.092	27.7363	20.4508	175.984	86.012	94.2356	95.961	149.953	399.798
AF-1	5.91	14.7912	1.45	0.715146	169.271	28.2103	22.2093	197.41	86.0039	101.541	85.0402	126.458	388.264
AF-2	5.96	8.00464	1.03	0.525445	31.695	7.58252	19.1953	101.538	76.7859	88.2869	81.3661	95.9176	329.057
AF-2	5.91	8.90255	1.11	0.494824	36.7079	9.00758	18.0012	96.6546	76.6455	83.1324	63.7013	109.889	322.081
AF-2	5.85	9.30858	1.13	0.51357	42.9778	9.53973	16.7356	99.325	70.3034	97.3463	77.4915	87.3899	307.424
AC-1	5.3	13.1531	0.8	0.516927	150.664	10.4473	19.587	170.286	89.4263	109.837	96.2773	191.058	289.764
AC-1	5.27	13.4571	0.78	0.508267	131.403	11.5908	18.7585	175.648	81.3152	107.757	89.8419	215.337	297.532
AC-1	5.3	13.051	0.85	0.534634	148.025	11.8298	21.8218	178.469	83.0342	94.5842	85.3938	204.024	278.01
AC-2	5.05	8.81671	0.62	0.336647	90.852	5.97524	11.143	158.831	86.3858	71.9895	83.3033	87.0115	200.586
AC-2	5.36	7.94664	0.61	0.335194	105.495	7.85719	13.3264	139.236	92.8193	73.6497	73.8218	91.3604	208.311
AC-2	5.07	8.46868	0.74	0.333407	92.2336	6.70866	13.9678	134.185	88.9113	83.726	83.3083	72.0877	223.684
